# Supplementary material for: Computational study of peptide bond formation in the gas phase through ion–molecule reactions
Source: Royal Society of Chemistry journal article supplement (doi:10.1039/c3cp51535d), 2013-01-01
Supplement: c3cp51535d.pdf [file c3cp51535d.pdf]

## Supplementary Information

### Computational study of peptide bond formation in the gas phase through ion-molecule reactions

Pilar Redondo<sup>1</sup>, Henar Martínez<sup>2</sup>, Álvaro Cimas<sup>3</sup>, Carmen Barrientos<sup>1</sup>,  
Antonio Largo<sup>1\*</sup>

<sup>1</sup>Departamento de Química Física y Química Inorgánica, Facultad de Ciencias, Universidad de Valladolid, 47011 Valladolid, Spain

<sup>2</sup>Departamento de Química Orgánica, Escuela de Ingenierías Industriales, Universidad de Valladolid, 47005 Valladolid, Spain

<sup>3</sup>LAMBE - Laboratoire Analyse et Modélisation pour la Biologie et l'Environnement ,  
Universite d'Evry val d'Essonne, UMR 8587, Blvd F. Mitterrand , Bat Maupertuis , 91025  
Evry, France

\* Corresponding author; e-mail: [alargo@qf.uva.es](mailto:alargo@qf.uva.es)

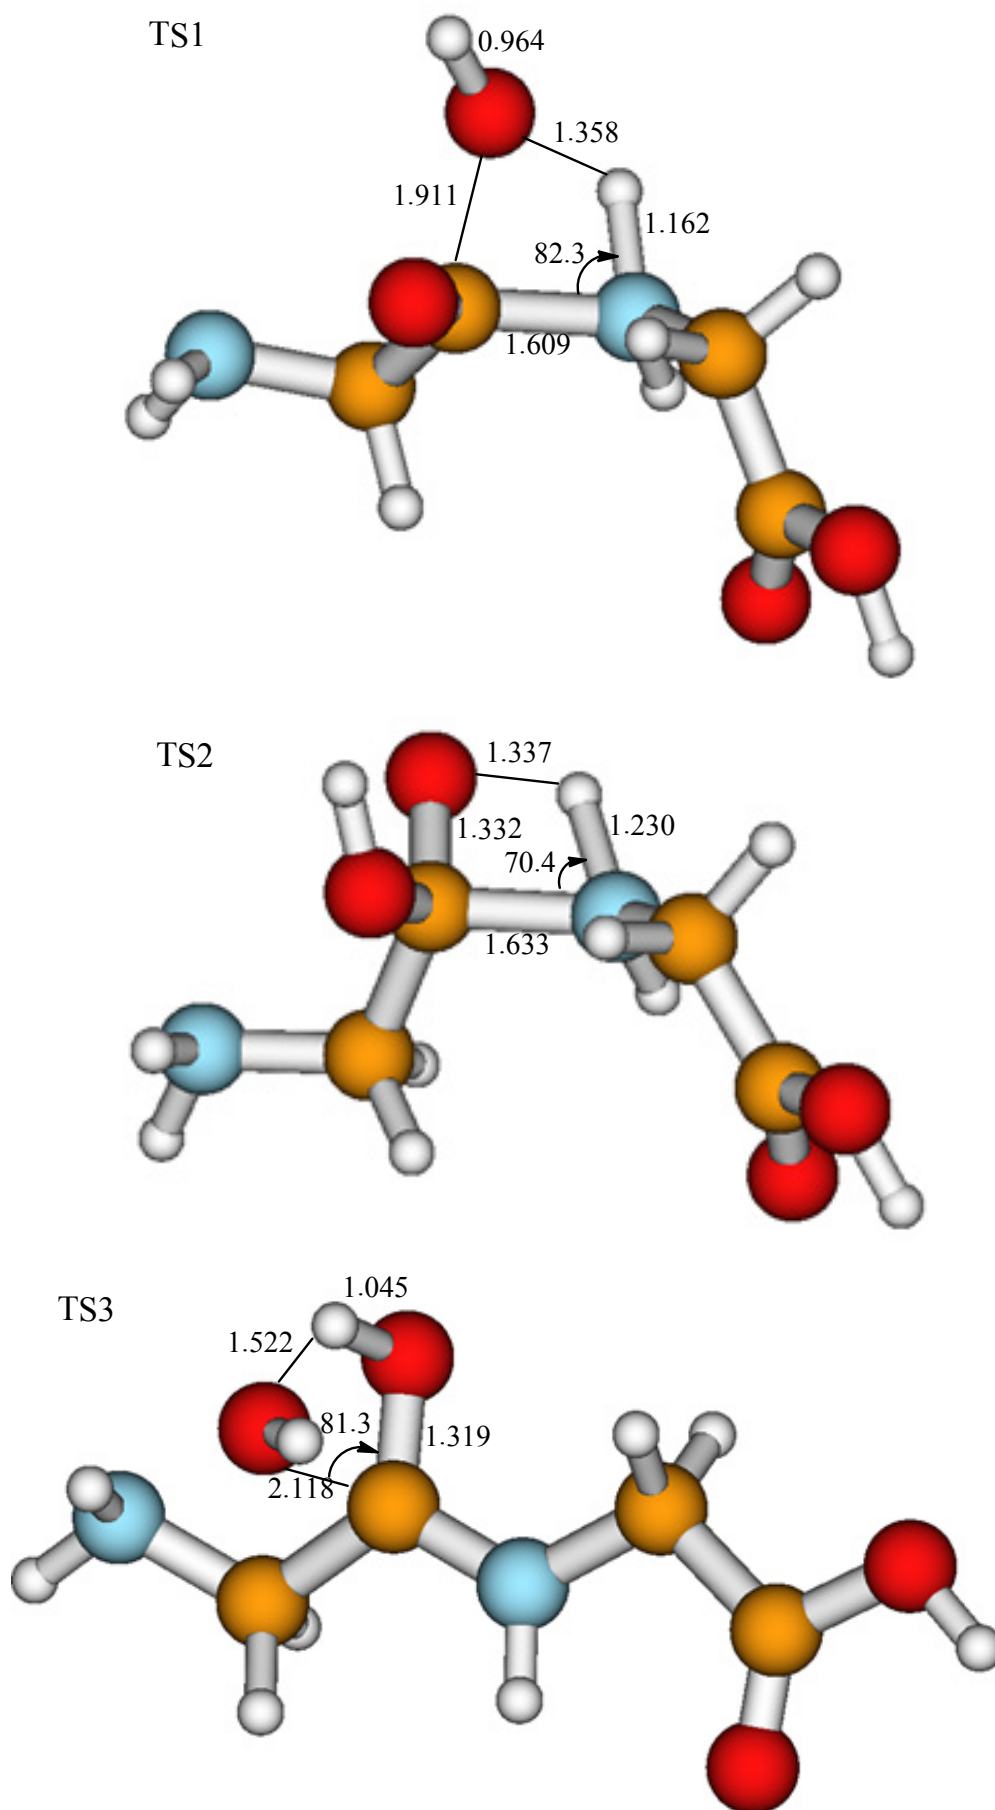

Figure S1. Transition states for the neutral reaction Gly + Gly

TS1(N)

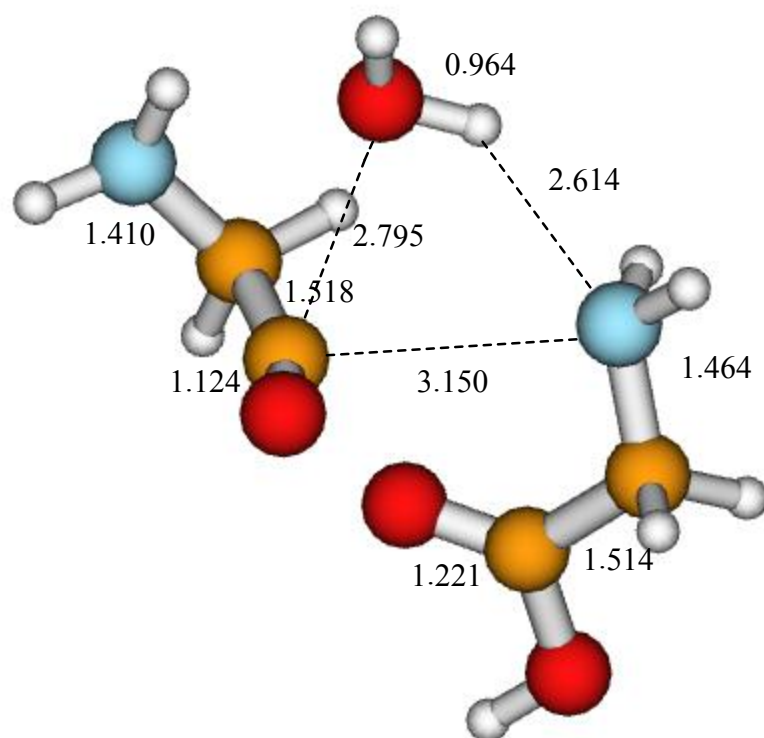

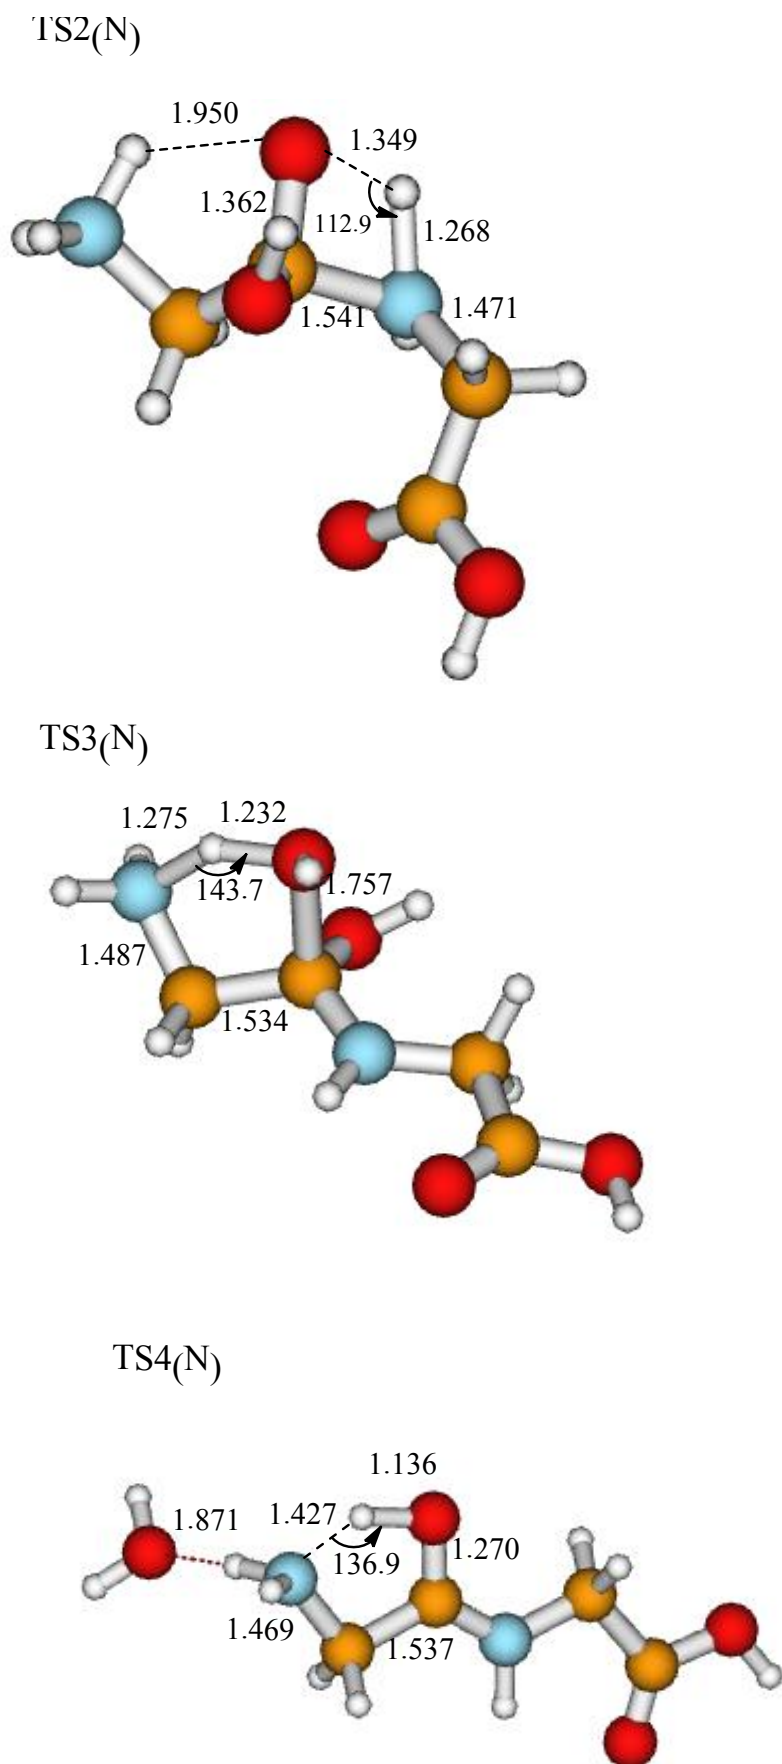

TS2(O)

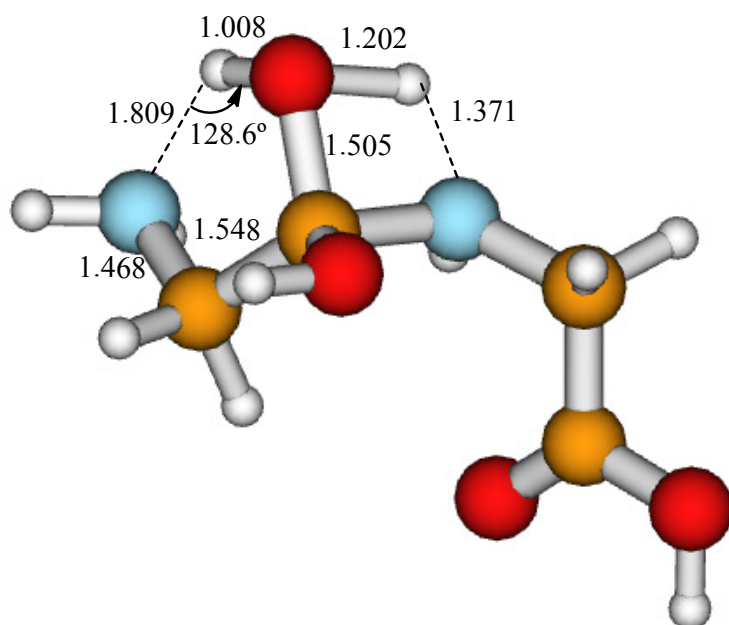

TS1(O)

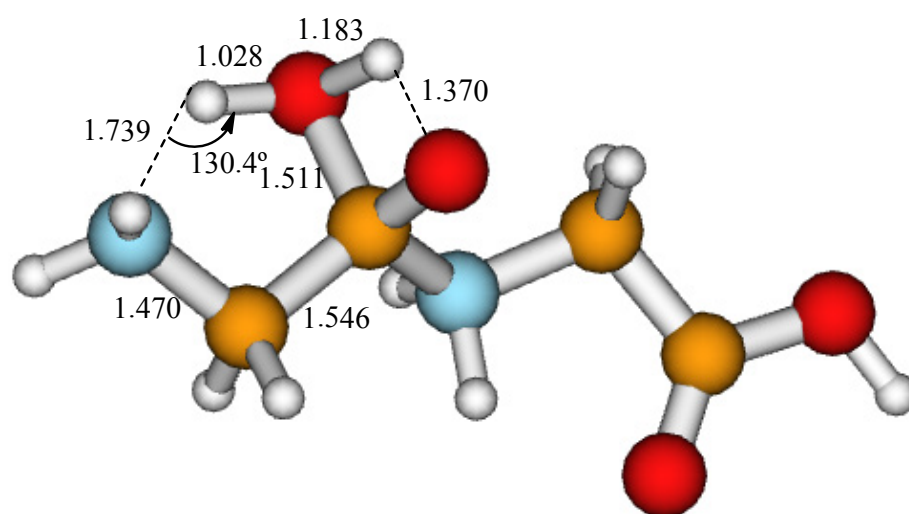

TS4(O)

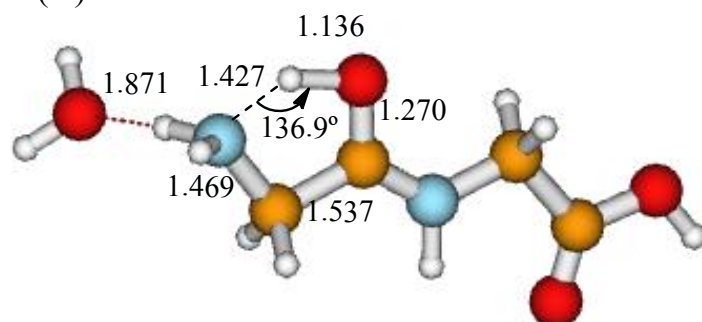

Figure S3. Transition states for the reaction  $\text{Gly} + \text{GlyH}^+(\text{O}_1)$
